# Supplementary material
Source: publisher site journal article supplement (https://www.dovepress.com/get_supplementary_file.php?f=247156.docx)
Supplement: Supplementary file 1 [file get_supplementary_file.php]

**Supplementary appendix**

**Modelling the Cost-Effectiveness of Indacaterol/ Glycopyrronium Versus Salmeterol/Fluticasone Using a Novel Markov Exacerbation-Based Approach**

Bhavesh Lakotia,1 Ronan Mahon,1 Florian S. Gutzwiller,2 Andrii Danyliv,1 Ivan Nikolaev,2 Praveen Thokala3

1Novartis Ireland Limited, Dublin, Ireland; 2Novartis Pharma AG, Basel, Switzerland; 3PT Health Economics Ltd, Sheffield, UK

Correspondence:

Ronan Mahon

Team Head, Patient Access Services

Product Lifecycle Services - NBS

Novartis Global Service Center Dublin

Vista Building, Elm Park Business Campus, Merrion Road

Dublin 4, IRELAND

Tel +353873647443

Fax +353 1 2601263

Email ronan.mahon@novartis.com

**Section 1.**

**Regression equation from Rutten-van Mölken et al. 2006**1

Utility value = 0.688 + Gender * 0.057 + FEV1 percent predicted * 0.003

+ Emergency Room visits in the last year * -0.029

+ Hospital admissions in the last year * -0.02

+ Number of concomitant diseases * -0.01 + BMI * -0.003S

**Table S1. Transition probabilities for the three different health states with salmeterol/fluticasone**

| **From \ to** | **IE** | **FE** | **Dead** |
| --- | --- | --- | --- |
| **IE** | (1-mortality) * 0.7026925 | (1-mortality) * 0.2973075 | mortality |
| **FE** | (1-mortality) * 0.4628369 | (1-mortality) * 0.5371631 | mortality |
| **Dead** | 0 | 0 | 1 |

The mortality parameter depends on age, sex and percentage of predicted forced expiratory volume in 1 second.

**Abbreviations:** FE, frequent exacerbator; IE, infrequent exacerbator.

**Table S2 ‒Transition probabilities for the three different health states with indacaterol/glycopyrronium**

| **From \ to** | **IE** | **FE** | **Dead** |
| --- | --- | --- | --- |
| **IE** | (1-mortality) * 0.7724824 | (1-mortality) * 0.2275176 | mortality |
| **FE** | (1-mortality) * 0.5478352 | (1-mortality) * 0.4521648 | mortality |
| **Dead** | 0 | 0 | 1 |

The mortality parameter depends on age, sex and percentage of predicted forced expiratory volume in 1 second.

**Abbreviations:** FE, frequent exacerbator; IE, infrequent exacerbator.

**Figure S1 ‒ Probabilistic sensitivity analysis of cost-effectiveness.**


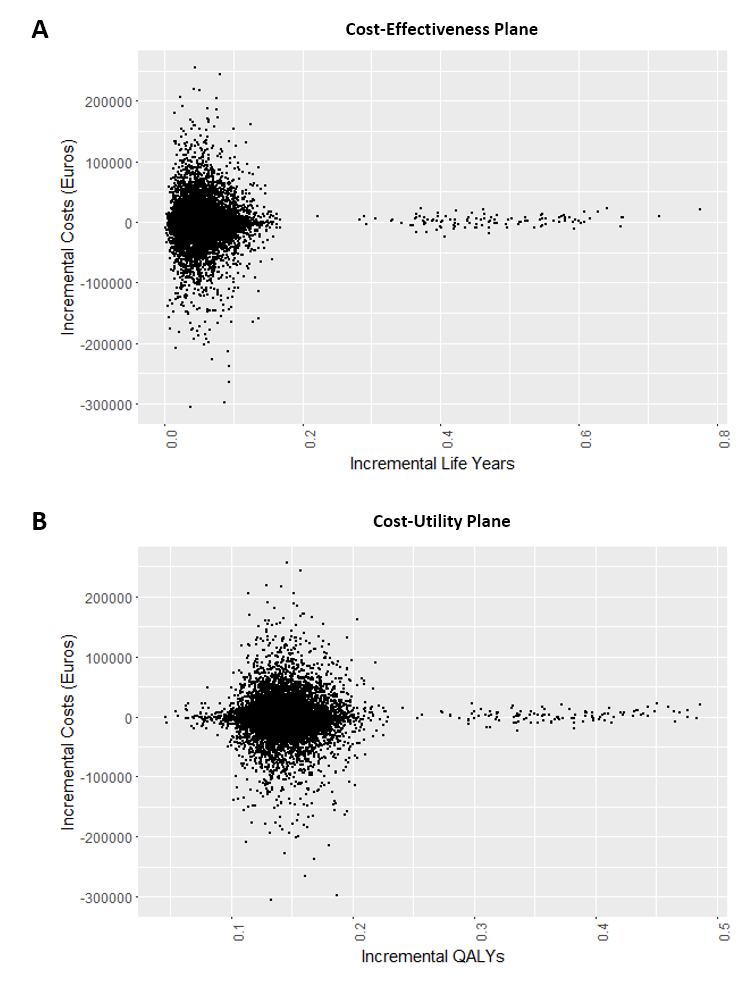


(Panel A) and cost-utility (Panel B) for indacaterol/glycopyrronium compared with salmeterol/fluticasone.

Probabilistic sensitivity analysis performed with input parameters characterized as statistical distributions to reflect uncertainty around the point estimates; a total of 10,000 simulations were run, sampling random values of the parameters from those distributions. In the probabilistic sensitivity analysis, almost 60% of the 10,000 sample results generated were concordant with IND/GLY dominating SFC, indicating that the results were consistent even when parameter uncertainty was included in the model.

**Abbreviation:** QALYs, quality-adjusted life years.

**Figure S2 ‒ Cost-effectiveness acceptability curve for indacaterol/glycopyrronium compared with salmeterol/fluticasone.**


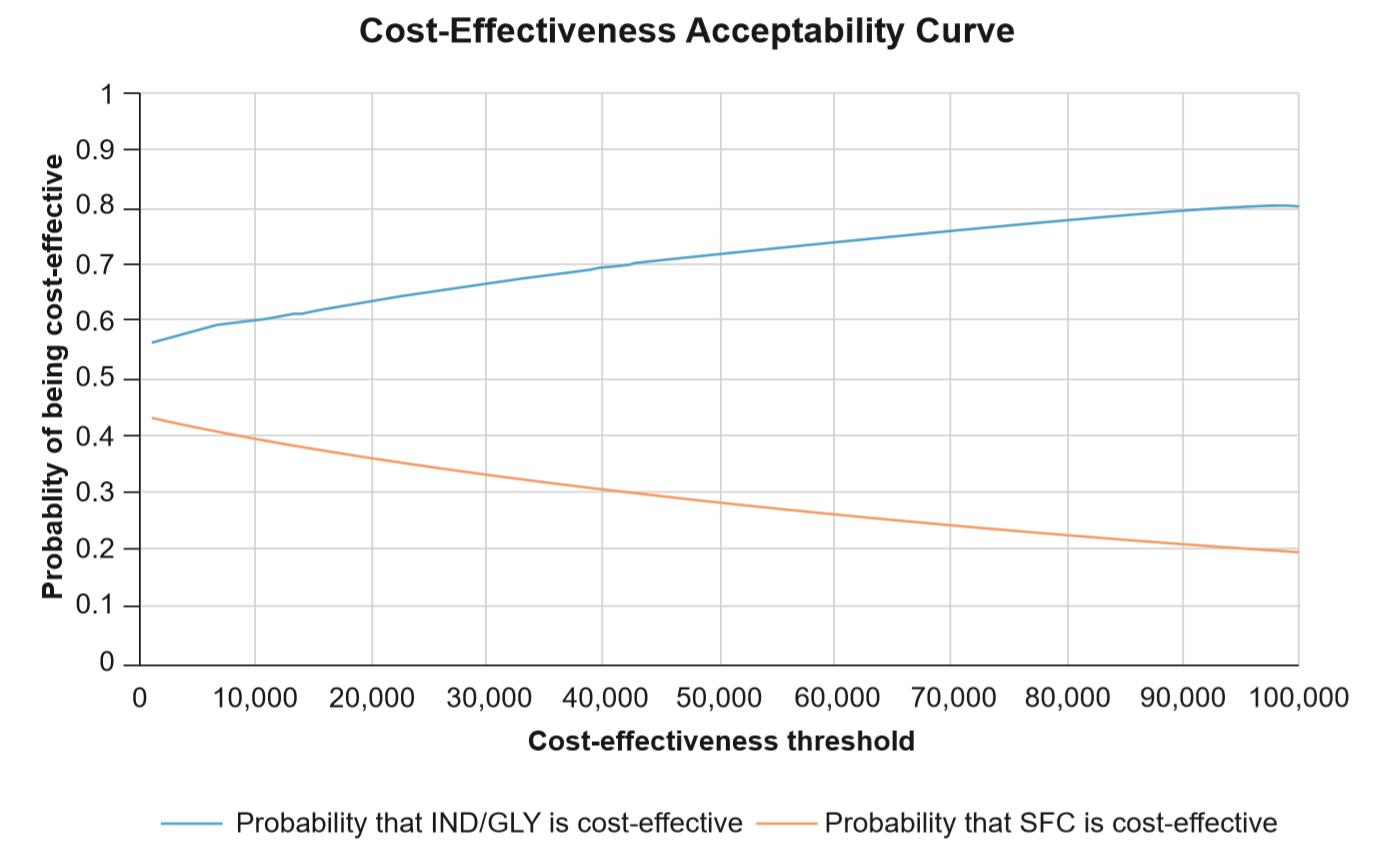


**Abbreviations:** IND/GLY, indacaterol/glycopyrronium; SFC, salmeterol/fluticasone.

Reference:

1. Rutten-van Molken MP, Oostenbrink JB, Tashkin DP, et al. Does quality of life of COPD patients as measured by the generic EuroQol five-dimension questionnaire differentiate between COPD severity stages? *Chest* 2006;130(4):1117-28. doi: 10.1378/chest.130.4.1117 [published Online First: 2006/10/13]
